# Supplementary figures and images for: National Utilization Patterns of Veterans Affairs Homelessness Programs in the Era of Housing First
Source: Atypon-hosted journal article supplement (doi:10.1176/appi.ps.201800393), 2019-01-17

# VA Homeless Program Sequences, by Profile

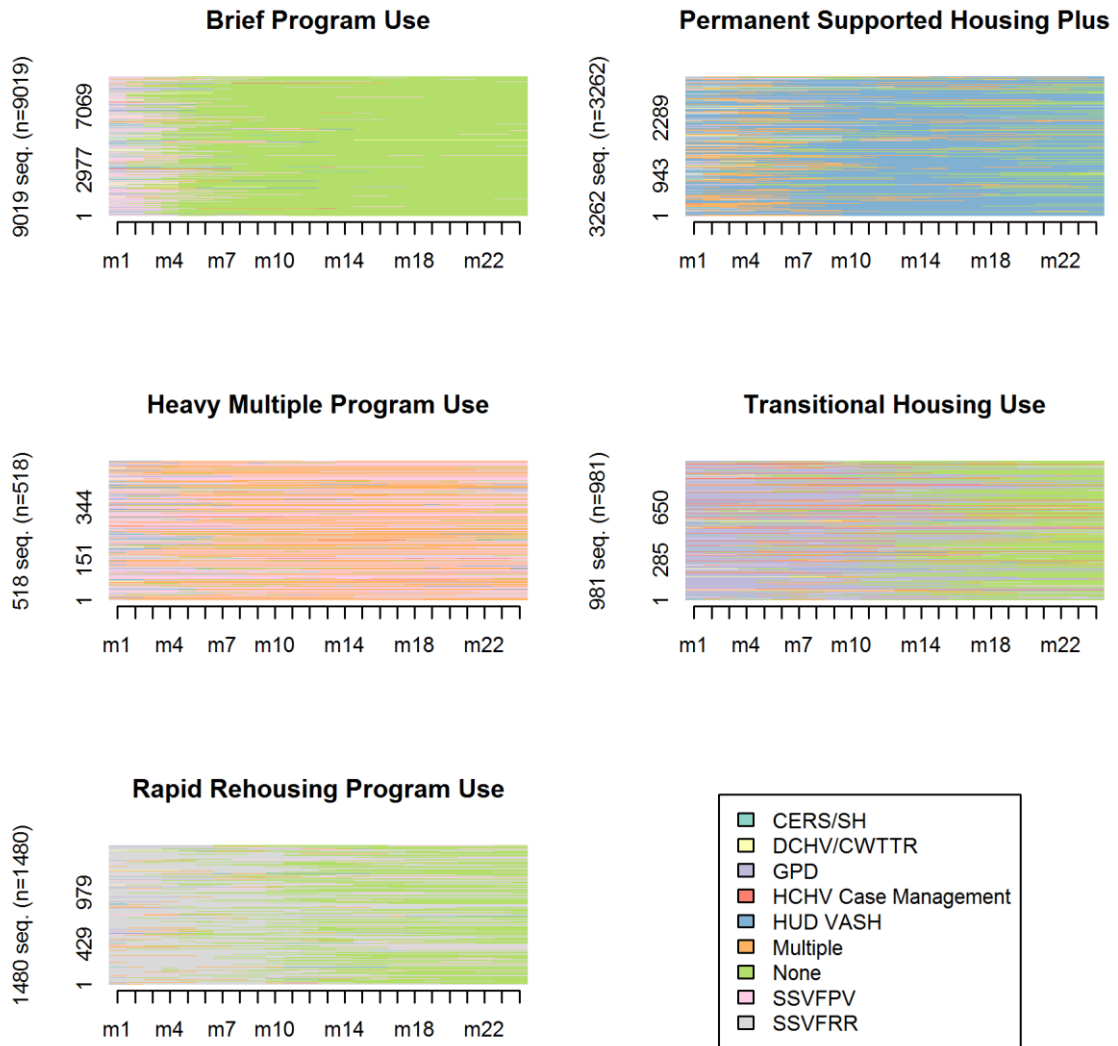

Supplement: appi.ps.201800393.ds001.pdf [file appi.ps.201800393.ds001.pdf]
